# Supplementary material
Source: PubMed Central journal article supplement (PMC1072484)

A

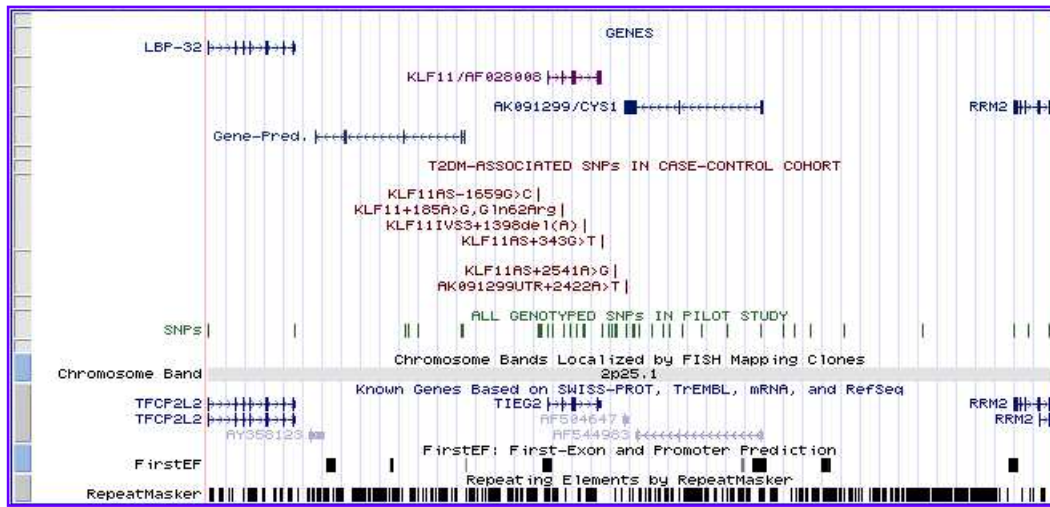

B

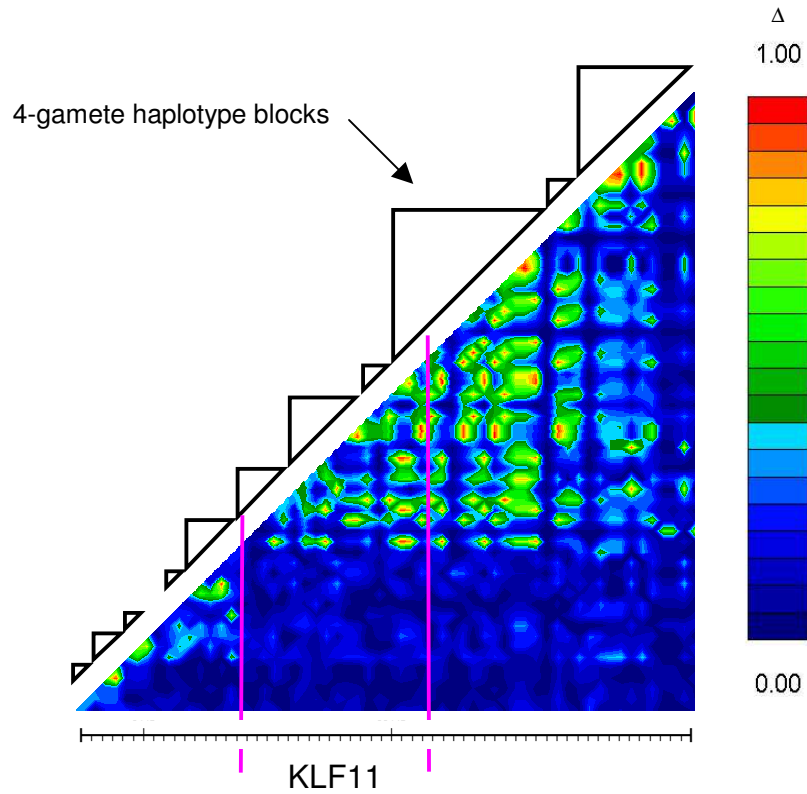

Supplement: pnas_102_13_4807__5.pdf [file pnas_102_13_4807__5.pdf]

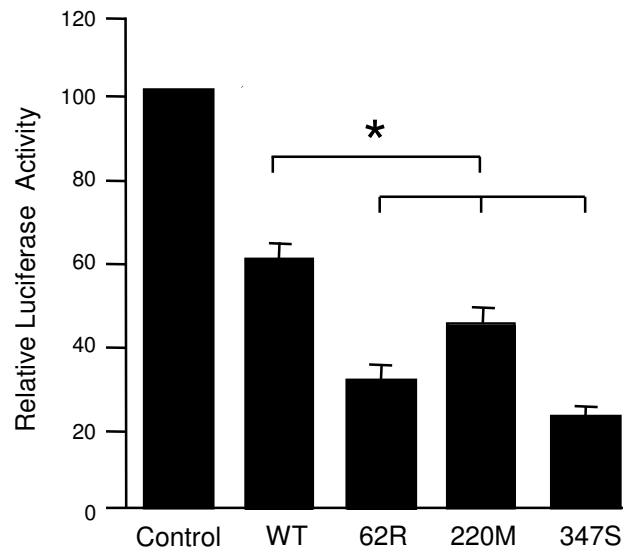

Supplement: pnas_102_13_4807__6.pdf [file pnas_102_13_4807__6.pdf]
